# Supplementary material
Source: Research Square preprint supplement (doi:10.21203/rs.3.rs-9396828/v1)

**Supplementary Table 1. Comparison of PB, CSF, and EEG parameters between ICANS and non-ICANS patients.**

|                               |         | ICANS (n = 18)   | non-ICANS (n = 6) | p-value      |
|-------------------------------|---------|------------------|-------------------|--------------|
| <b>Peripheral blood</b>       |         |                  |                   |              |
| PLT                           | (109/L) | 41 (20.0-71.25)  | 32 (23.25-36.25)  | 0.345        |
| LDH                           | (U/L)   | 252 (211-482)    | 157 (124-1773)    | 0.151        |
| Creatinine                    | (mg/dL) | 0.85 (0.68-1.05) | 0.56 (0.35-0.69)  | <b>0.007</b> |
| CRP                           | (mg/dL) | 1.04 (0.33-2.50) | 2.35 (0.50-4.80)  | 0.297        |
| Ferritin                      | (ng/mL) | 932 (389-3043)   | 2217 (1399-2800)  | 0.290        |
| Fibrinogen                    | (mg/dL) | 232 (182-286)    | 359 (280-483)     | <b>0.005</b> |
| EASIX score                   |         | 9.4 (2.4-20.3)   | 2.3 (1.4-33.2)    | 0.332        |
| modify-EASIX score            |         | 5.0 (3.5-11.9)   | 8.8 (1.3-521.7)   | 0.739        |
| simply-EASIX score            |         | 7.6 (2.9-15.4)   | 5.3 (3.4-52.5)    | 0.434        |
| <b>Cerebrospinal fluid</b>    |         |                  |                   |              |
| Leukocyte count               | (/μL)   | 2 (1-6)          | 10 (6-21)         | 0.132        |
| LDH                           | (U/L)   | 23 (19-35)       | 27 (23-44)        | 0.160        |
| Total protein                 | (U/L)   | 83 (55-136)      | 66 (49-82)        | 0.589        |
| CD3+ CAR-T                    | (%)     | 32.3 (15.3-53.8) | 7.9 (2.7-15.0)    | <b>0.018</b> |
| CD4+ CAR-T                    | (%)     | 15.8 (6.9-32.4)  | 6.3 (2.2-10.1)    | <b>0.045</b> |
| CD8+ CAR-T                    | (%)     | 6.0 (1.3-12.7)   | 0.4 (0.1-4.2)     | 0.055        |
| CAR-T CD4/8 ratio             |         | 3.2 (1.7-5.0)    | 6.3 (1.7-38.2)    | 0.194        |
| <b>Electroencephalography</b> |         |                  |                   |              |
| Overall assessment            |         |                  |                   | 0.125        |
| Normal                        |         | 2                | 1                 |              |
| Mildly abnormal               |         | 3                | 3                 |              |
| Moderately abnormal           |         | 7                | 0                 |              |
| N/A                           |         | 6                | 2                 |              |
| FIRDA                         |         |                  |                   | 1.000        |
| Yes                           |         | 9                | 3                 |              |
| No                            |         | 3                | 1                 |              |
| N/A                           |         | 6                | 2                 |              |

ICANS immune effector cell-associated neurotoxicity syndrome, PLT Platelet, LDH lactic dehydrogenase, CRP c-reactive protein, EASIX endothelial activation and stress index, CAR chimera antigen receptor, FIRDA frontal intermittent rhythmic delta activity, N/A not applicable

**Supplementary Fig. 1** The correlation between PB and CSF CAR-T cell frequencies

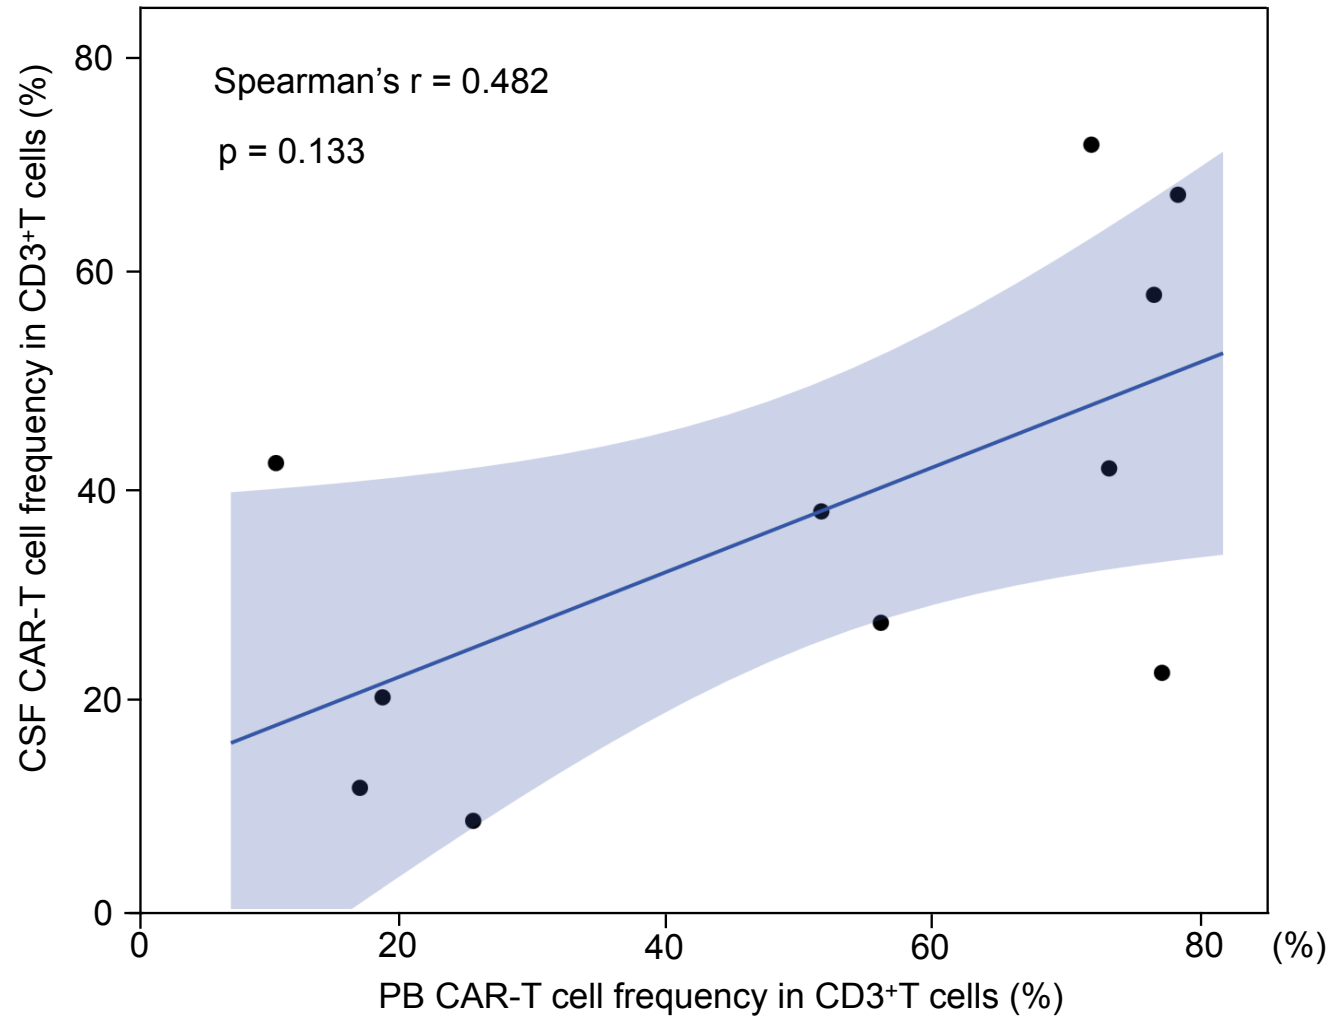

Supplement: Supplementary file 1 [file 5e2d36a493d26e67e97f77c9.pdf]
