# Supplementary material
Source: Research Square preprint supplement (doi:10.21203/rs.3.rs-9396828/v1)
Supplement: Supplementary file 2 [file f8fd53ecc4efac3ddf7b9d7c.pdf]

**Table 1. Patients' Characteristics**

|                                         | ICANS (n = 18) | non-ICANS (n = 6) | p-value |
|-----------------------------------------|----------------|-------------------|---------|
| <b>Age at CAR-T infusion in years</b>   |                |                   | 0.102   |
| Median (range)                          | 65 (42-73)     | 58 (42-71)        |         |
| <b>SEX</b>                              |                |                   | 0.586   |
| Male                                    | 14             | 4                 |         |
| Female                                  | 4              | 2                 |         |
| <b>Diagnosis</b>                        |                |                   | 0.528   |
| Diffuse large B-cell lymphoma           | 13             | 6                 |         |
| High grade B-cell lymphoma              | 3              | 0                 |         |
| Follicular lymphoma                     | 2              | 0                 |         |
| <b>Disease status at CAR-T infusion</b> |                |                   | 0.772   |
| CR                                      | 4              | 1                 |         |
| nonCR                                   | 14             | 5                 |         |
| <b>Cellular infused product</b>         |                |                   | 0.146   |
| Tisa-cel                                | 5              | 4                 |         |
| Liso-cel                                | 7              | 2                 |         |
| Axi-cel                                 | 6              | 0                 |         |
| <b>CRS grade</b>                        |                |                   | 0.092   |
| No CRS                                  | 2              | 0                 |         |
| Grade1                                  | 6              | 6                 |         |
| Grade2                                  | 7              | 0                 |         |
| Grade3                                  | 2              | 0                 |         |
| Grade4                                  | 1              | 0                 |         |
| <b>ICANS grade</b>                      |                |                   | NA      |
| Grade1                                  | 10             | -                 |         |
| Grade2                                  | 6              | -                 |         |
| Grade3                                  | 2              | -                 |         |
| Grade4                                  | 0              | -                 |         |
| <b>Day of symptom onset</b>             |                |                   | 0.487   |
| Median (range)                          | 6 (3-38)       | 10 (1-21)         |         |

ICANS immune effector cell-associated neurotoxicity syndrome, CAR chimera antigen receptor, CR complete remission, Tisa-cel tisagenlecleuce, Liso-cel lisocabtagene maraleuce, Axi-cel axicabtagene ciloleucel, CRS cytokine release syndrome
